# Supplementary material for: Hydrogen sulphide donors selectively potentiate a green tea polyphenol EGCG-induced apoptosis of multiple myeloma cells
Source: PubMed Central journal article supplement (PMC5532223; doi:10.1038/s41598-017-06879-5), 2017-07-27

# Hydrogen sulphide donors selectively potentiate a green tea polyphenol EGCG-induced apoptosis of multiple myeloma cells

Jaehoon Bae, Motofumi Kumazoe, Shuya Yamashita & Hirofumi Tachibana

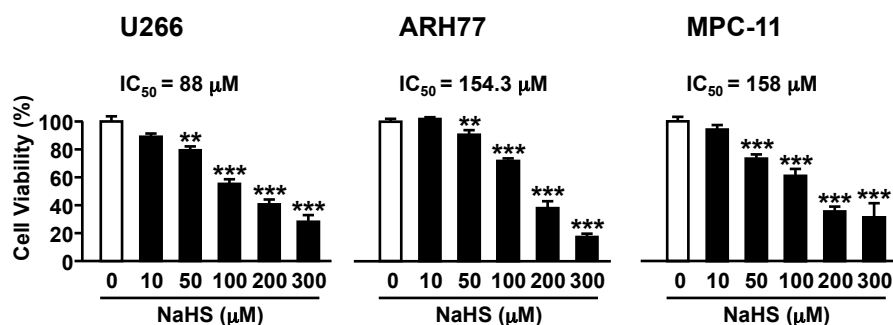

## Supplementary Fig. 1: Cell death-inducing activity of NaHS in MM cells.

U266, ARH77 and MPC11 cells are treated with NaHS for 96 h at the indicated concentrations, and viable cell numbers are measured. The IC<sub>50</sub> value calculations are performed. Data are presented as mean ± SEM ( $n = 3$ ). \*\* $P < 0.01$ , \*\*\* $P < 0.001$ .

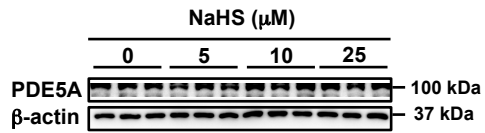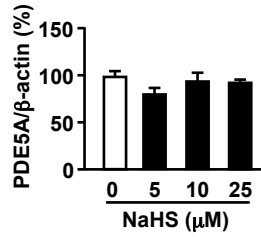

**Supplementary Fig. 2: NaHS has no effect on the protein level of PDE5A.**

U266 cells are treated with NaHS for 3 h at the indicated concentrations, and protein level of PDE5A is assessed by western blot analysis. Data are presented as mean  $\pm$  SEM ( $n = 3$ ).

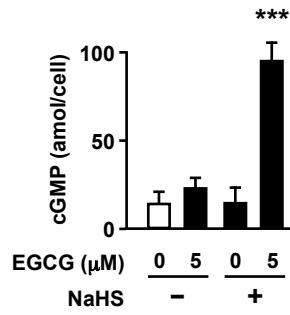

**Supplementary Fig. 3: NaHS potentiates cGMP-inducing effect of EGCG.**

U266 cells are treated with 10 μM NaHS and/or indicated concentrations of EGCG for 3 h, and cGMP levels is asseesed. Data are presented as mean ± SEM ( $n = 3$ ). \*\*\* $P < 0.001$ .

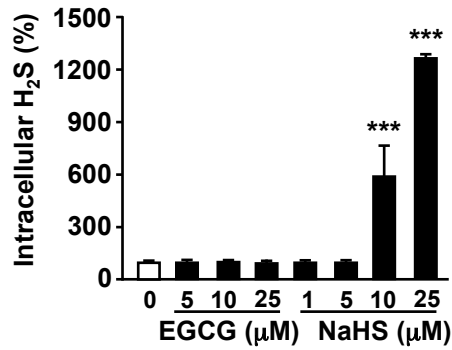

**Supplementary Fig. 4: The effect of EGCG or NaHS on intracellular H<sub>2</sub>S production.**

U266 cells are treated with EGCG or NaHS for 3 hours at the indicated concentrations, and intracellular H<sub>2</sub>S are measured by highly selective fluorescence probe HSip-1 ( $\lambda_{\text{ex}}$  491 nm,  $\lambda_{\text{em}}$  516 nm). Data are presented as mean  $\pm$  SEM ( $n = 3$ ). \*\*\* $P < 0.001$ .

**a**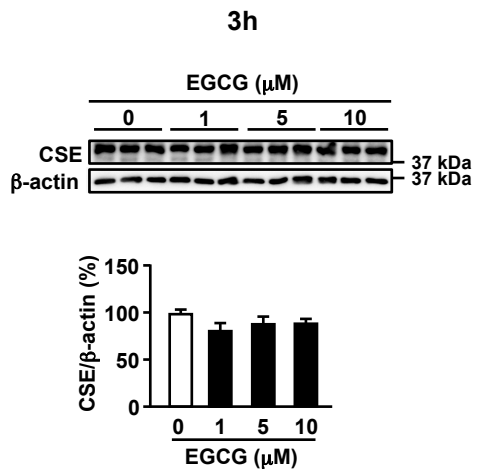**b**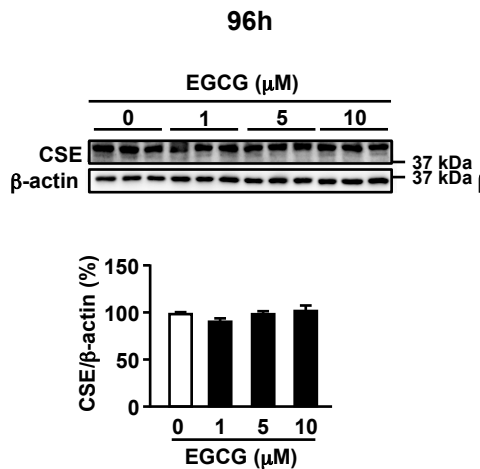**c**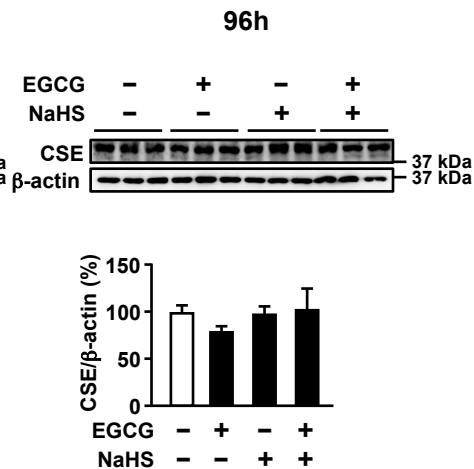

**Supplementary Fig. 5: EGCG and/or NaHS have no effect on CSE expression.**

(a) U266 cells are treated with EGCG for 3 h at the indicated concentrations, and protein level of CSE is assessed by western blot analysis. (b) U266 cells are treated with EGCG for 96 h at the indicated concentrations, and protein level of CSE is assessed by western blot analysis. (c) U266 cells are treated with 5  $\mu\text{M}$  EGCG and/or 10  $\mu\text{M}$  NaHS for 96 h, and protein level of CSE is assessed by western blot analysis. Data are presented as mean  $\pm$  SEM ( $n = 3$ ).

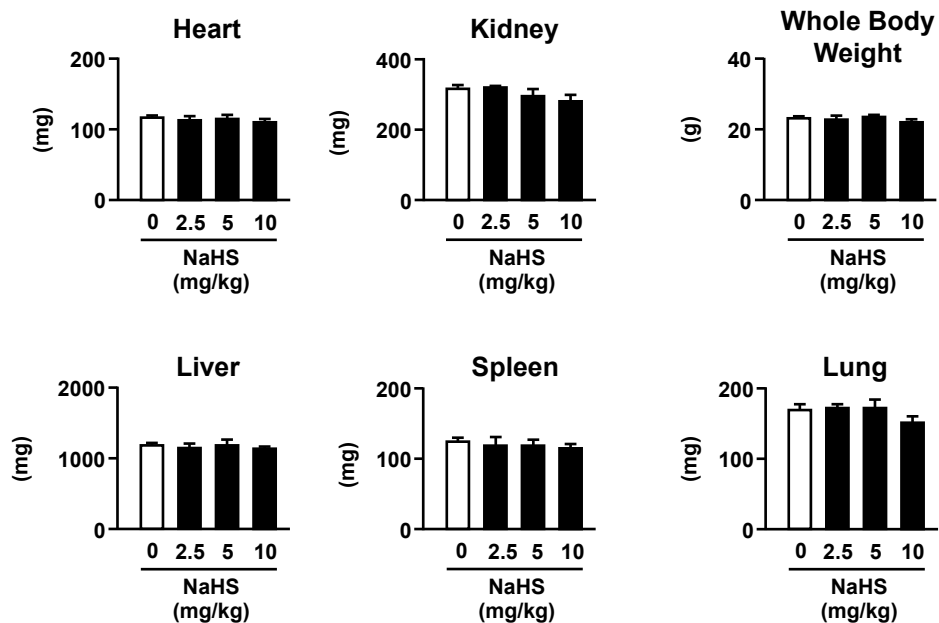

**Supplementary Fig. 6: Evaluation on the toxicity of NaHS *in vivo*.**

Five-week-old BALB/c mice ( $n = 14$  per group) are administered i.p. injections of NaHS every 2 days at the indicated concentrations. Heart, kidney, liver, spleen and lung tissue weights and mice body weights are evaluated after 8 weeks. Data are presented as mean  $\pm$  SEM.

**Fig 2c**

**U266**

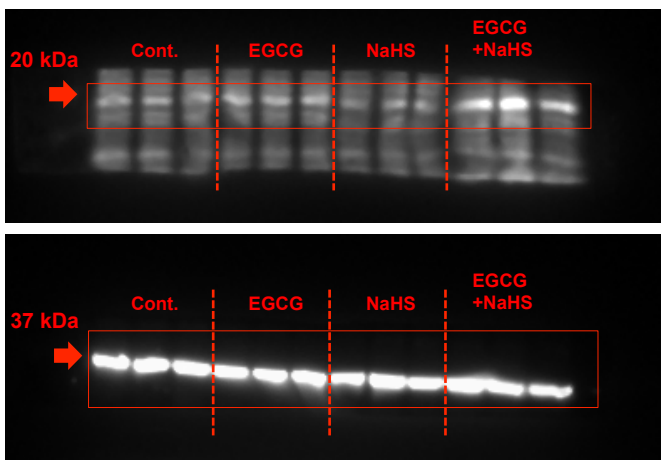

**Fig 2c**

**ARH77**

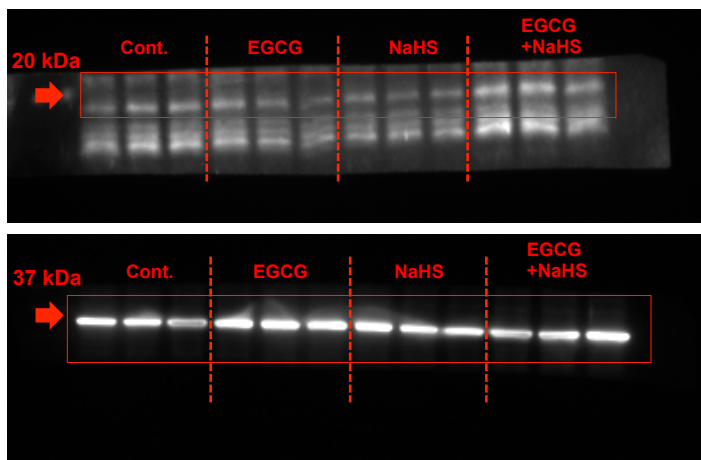

**Fig 3c**

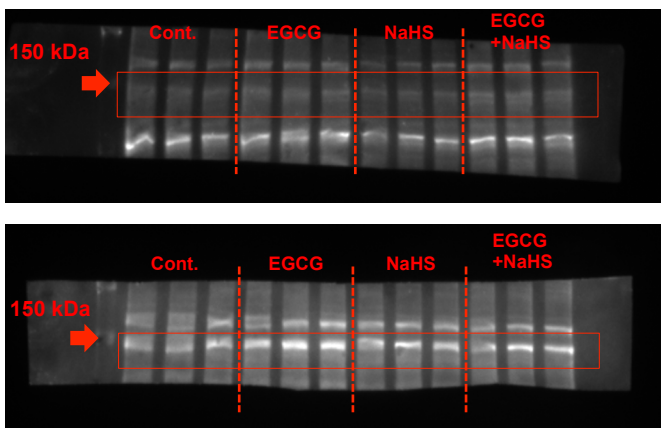

Supplement: 41598_2017_6879_MOESM1_ESM.pdf [file 41598_2017_6879_MOESM1_ESM.pdf]
